# Supplementary material for: The Genetic Diversity and Antimicrobial Resistance of Pyogenic Pathogens Isolated from Porcine Lymph Nodes
Source: MDPI journal article supplement (doi:10.3390/antibiotics12061026), 2023-06-07
Supplement: s1 [file s1]

**Table S3.** Distribution of minimum inhibitory concentration (MIC) of eight antimicrobial agents; MIC<sub>50</sub> and MIC<sub>90</sub> values for the studied *Staphylococcus aureus* isolates from pigs (n=5).

| Antimicrobial agents <sup>a</sup> | Number of Isolates with MIC (µg/mL) <sup>b</sup> |       |       |       |       |       |      |      |      |     |      |     | MIC <sub>50</sub> | MIC <sub>90</sub> |
|-----------------------------------|--------------------------------------------------|-------|-------|-------|-------|-------|------|------|------|-----|------|-----|-------------------|-------------------|
|                                   | 0.023                                            | 0.032 | 0.047 | 0.064 | 0.094 | 0.125 | 0.19 | 0.25 | 0.38 | 0.5 | 0.75 | 1   |                   |                   |
| PEN                               | 1                                                | 2     | 1     |       |       | 1     |      |      |      |     |      |     | 0.032             | 0.125             |
| AMC                               |                                                  |       |       |       | 1     | 3     |      | 1    |      |     |      |     | 0.125             | 0.25              |
| CIP                               |                                                  |       |       |       |       |       |      | 4    |      |     | 1    |     | 0.25              | 0.75              |
| GEN                               |                                                  |       |       |       |       | 2     | 3    |      |      |     |      |     | 0.19              | 0.19              |
| ERY                               |                                                  |       |       | 2     | 2     |       |      |      |      | 1   |      |     | 0.094             | 0.5               |
| SXT                               |                                                  |       |       |       |       | 2     | 1    | 1    | 1    |     |      |     | 0.19              | 0.38              |
| DOX                               |                                                  |       |       |       |       |       |      | 1    | 3    | 1   |      |     | 0.38              | 0.5               |
|                                   | 0.75                                             | 1     | 1.5   | 2     | 3     | 4     | 6    | 8    | 12   | 16  | 24   | >32 |                   |                   |
| CTX                               |                                                  |       |       |       | 2     | 1     |      |      | 1    |     |      | 1   | 4                 | >32               |

<sup>a</sup> PEN – penicillin, AMC – amoxicillin/clavulanic acid, CTX – cefotaxime, CIP – ciprofloxacin, ERY – erythromycin, DOX – doxycycline, GEN – gentamicin, SXT – trimethoprim-sulfamethoxazole; <sup>b</sup> MIC range for tested antimicrobial agents.
