# Supplementary material for: The Genetic Diversity and Antimicrobial Resistance of Pyogenic Pathogens Isolated from Porcine Lymph Nodes
Source: MDPI journal article supplement (doi:10.3390/antibiotics12061026), 2023-06-07
Supplement: s1 [file s1]

**Table S1.** Distribution of minimum inhibitory concentration (MIC) of eight antimicrobial agents; MIC<sub>50</sub> and MIC<sub>90</sub> values for the studied *Streptococcus* spp. isolates from pigs (*n*=48).

| Antimicrobial agent <sup>a</sup> | Number of Isolates with MIC (µg/mL) <sup>b</sup> |              |              |             |             |             |            |             |           |            |           |                | MIC <sub>50</sub> | MIC <sub>90</sub> |
|----------------------------------|--------------------------------------------------|--------------|--------------|-------------|-------------|-------------|------------|-------------|-----------|------------|-----------|----------------|-------------------|-------------------|
|                                  | 0.003                                            | 0.004        | 0.006        | 0.008       | 0.012       | <0.016      | 0.016      | 0.023       | 0.032     | 0.047      | 0.064     | 0.094          |                   |                   |
| PEN                              | 2                                                | 16           | 13           | 4           | 3           |             | 6          | 3           |           | 1          |           |                | 0.006             | 0.016             |
| AMC                              |                                                  |              |              |             |             | 8           | 18         | 13          | 1         | 5          | 3         |                | 0.016             | 0.047             |
| CTX                              |                                                  |              |              |             | 1           |             | 8          | 8           | 13        | 6          | 5         | 7              | 0.032             | 0.094             |
|                                  | <b>0.25</b>                                      | <b>0.38</b>  | <b>0.5</b>   | <b>0.75</b> | <b>1</b>    | <b>1.5</b>  | <b>2</b>   | <b>3</b>    | <b>4</b>  | <b>6</b>   | <b>8</b>  | <b>12</b>      |                   |                   |
| CIP                              | 3                                                | 9            | 18           | 16          | 1           |             | 1          |             |           |            |           |                | 0.5               | 0.75              |
| GEN                              |                                                  |              | 3            | 7           | 10          | 10          | 9          | 4           | 5         |            |           |                | 1.5               | 3                 |
|                                  | <b>0.064</b>                                     | <b>0.094</b> | <b>0.125</b> | <b>0.19</b> | <b>0.25</b> | <b>0.38</b> | <b>0.5</b> | <b>0.75</b> | <b>1</b>  | <b>1.5</b> | <b>2</b>  | <b>&gt;256</b> |                   |                   |
| ERY                              | 1                                                | 6            | 11           | 6           | 4           | 5           | 2          | 9           |           |            |           | 4              | 0.19              | 0.75              |
|                                  | <b>0.125</b>                                     | <b>0.19</b>  | <b>0.25</b>  | <b>0.38</b> | <b>0.5</b>  | <b>0.75</b> | <b>1</b>   | <b>1.5</b>  | <b>3</b>  | <b>8</b>   | <b>12</b> | <b>&gt;32</b>  |                   |                   |
| SXT                              | 6                                                | 10           | 3            | 7           | 4           | 6           | 2          | 4           | 2         | 1          |           | 3              | 0.38              | 3                 |
|                                  | <b>0.094</b>                                     | <b>0.125</b> | <b>0.19</b>  | <b>0.25</b> | <b>0.38</b> | <b>0.5</b>  | <b>4</b>   | <b>12</b>   | <b>16</b> | <b>24</b>  | <b>32</b> | <b>48</b>      |                   |                   |
| DOX                              | 2                                                | 3            | 5            | 10          | 2           | 2           | 1          | 3           | 11        | 5          | 2         | 2              | 0.5               | 24                |

<sup>a</sup> PEN – penicillin, AMC – amoxicillin/clavulanic acid, CTX – cefotaxime, CIP – ciprofloxacin, ERY – erythromycin, DOX – doxycycline, GEN – gentamicin, SXT – trimethoprim-sulfamethoxazole; <sup>b</sup> MIC range for tested antimicrobial agents.
