# Supplementary material for: The Genetic Diversity and Antimicrobial Resistance of Pyogenic Pathogens Isolated from Porcine Lymph Nodes
Source: MDPI journal article supplement (doi:10.3390/antibiotics12061026), 2023-06-07
Supplement: s1 [file s1]

**Table S2.** Distribution of minimum inhibitory concentration (MIC) of eight antimicrobial agents; MIC<sub>50</sub> and MIC<sub>90</sub> values for the studied *Rhodococcus equi* isolates from pigs (n=17).

| Antimicrobial agents <sup>a</sup> | Number of Isolates with MIC (µg/mL) <sup>b</sup> |      |      |      |     |      |    |     |    |    |    |      | MIC <sub>50</sub> | MIC <sub>90</sub> |
|-----------------------------------|--------------------------------------------------|------|------|------|-----|------|----|-----|----|----|----|------|-------------------|-------------------|
|                                   | 0.75                                             | 1    | 1.5  | 2    | 3   | 4    | 6  | 8   | 12 | 16 | 24 | >32  |                   |                   |
| PEN                               |                                                  |      |      | 2    | 1   | 3    | 2  |     | 1  |    |    | 8    | 12                | >32               |
| AMC                               | 3                                                | 3    | 6    | 3    | 2   |      |    |     |    |    |    |      | 1.5               | 2                 |
| CTX                               |                                                  |      |      |      |     | 3    | 2  | 1   |    |    |    | 11   | >32               | >32               |
|                                   | 0.25                                             | 0.38 | 0.5  | 0.75 | 1   | 1.5  | 2  | 3   | 4  | 6  | 8  | >32  |                   |                   |
| CIP                               | 1                                                | 4    | 1    | 4    | 4   | 2    |    |     |    |    |    | 1    | 0.75              | 1.5               |
| GEN                               | 1                                                | 6    | 4    | 5    |     |      |    |     |    |    | 1  |      | 0.5               | 0.75              |
|                                   | 0.125                                            | 0.19 | 0.25 | 0.38 | 0.5 | 0.75 | 1  | 1.5 | 2  | 3  | 4  | 6    |                   |                   |
| ERY                               | 2                                                | 5    | 4    | 4    | 2   |      |    |     |    |    |    |      | 0.25              | 0.38              |
|                                   | 0.5                                              | 0.75 | 1.5  | 2    | 3   | 4    | 6  | 8   | 12 | 16 | 24 | >32  |                   |                   |
| SXT                               | 1                                                |      | 2    | 6    |     |      | 1  | 1   | 1  |    |    | 5    | 2                 | >32               |
|                                   | 1.5                                              | 2    | 3    | 4    | 6   | 8    | 12 | 16  | 24 | 32 | 48 | >256 |                   |                   |
| DOX                               | 1                                                |      |      | 3    | 4   | 6    | 3  |     |    |    |    |      | 8                 | 12                |

<sup>a</sup> PEN – penicillin, AMC – amoxicillin/clavulanic acid, CTX – cefotaxime, CIP – ciprofloxacin, ERY – erythromycin, DOX – doxycycline, GEN – gentamicin, SXT – trimethoprim-sulfamethoxazole; <sup>b</sup> MIC range for tested antimicrobial agents.
